# Supplementary material for: A novel method for making highly dispersible conducting polymer and concentric graphitic carbon nano-spheres based on an undoped and functionalized polyaniline
Source: Royal Society of Chemistry journal article supplement (doi:10.1039/b804131h), 2008-01-01
Supplement: b804131h.pdf [file b804131h.pdf]

## Supplementary Information

### A Novel Method for Making Highly Dispersible Conducting Polymer and Concentric Graphitic Carbon Nano-Spheres Based on an Undoped and Functionalized Polyaniline

*Chien-Chung Han, \* Meng-Yi Bai, Ku-Feng Yang, Yi-shuan Lee, and Chia-Wei Lin*

**Department of Chemistry, National Tsing Hua University, Hsinchu, Taiwan, ROC**

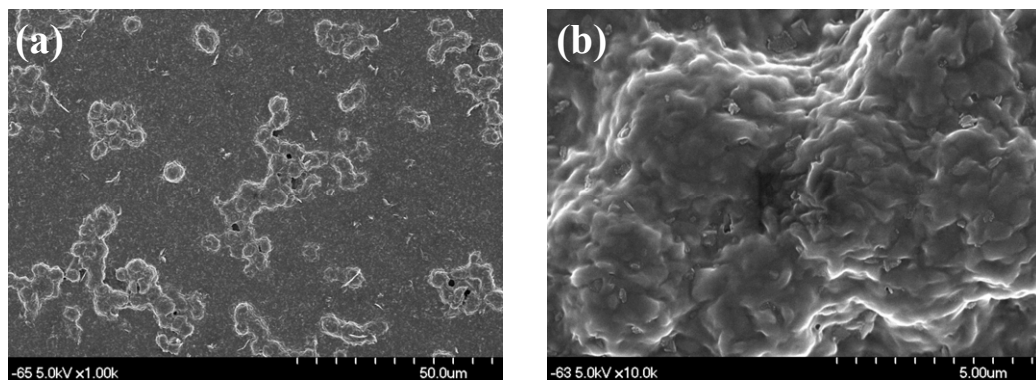

**Figure S1.** SEM micrographs for the Pani-SBu samples cast directly from the NMP/EG co-solvent solution, before the dithiol treatment. The magnifications are: (a) 1k and (b) 10k.

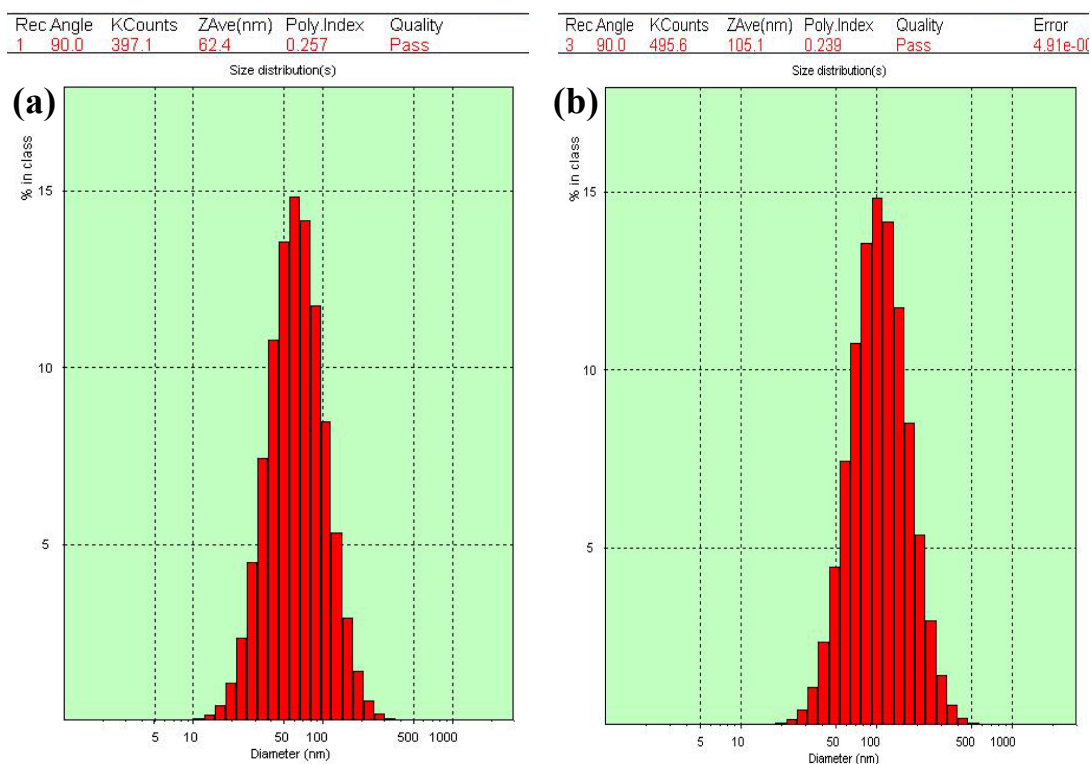

**Figure S2.** Dynamic light scattering (DLS) studies for the Pani-SBu micelle-like self-assembly (3.67 mM) in the NMP/EG (v;v = 1/2) co-solvent medium after being equilibrated at 60 °C for 1 h : (a) before, and (b) after the addition of ethane-1,2-dithiol (0.025 equiv).
